# Supplementary material for: Rate coefficients for the O + H2 and O + D2 reactions: how well ring polymer molecular dynamics accounts for tunelling
Source: Royal Society of Chemistry journal article supplement (doi:10.1039/d4cp01711k), 2024-01-01
Supplement: d4cp01711k1.pdf [file d4cp01711k1.pdf]

## Supplementary Material: Rate coefficients for the $O+H_2$ and $O+D_2$ reactions: How well Ring Polymer Molecular Dynamics accounts for tunneling.

Marta Menéndez<sup>a</sup>, Anzhela Veselinova<sup>b</sup>, Alexandre Zanchet<sup>c</sup>, Pablo G. Jambrina<sup>b</sup>, and F. Javier Aoiz<sup>\*a</sup>

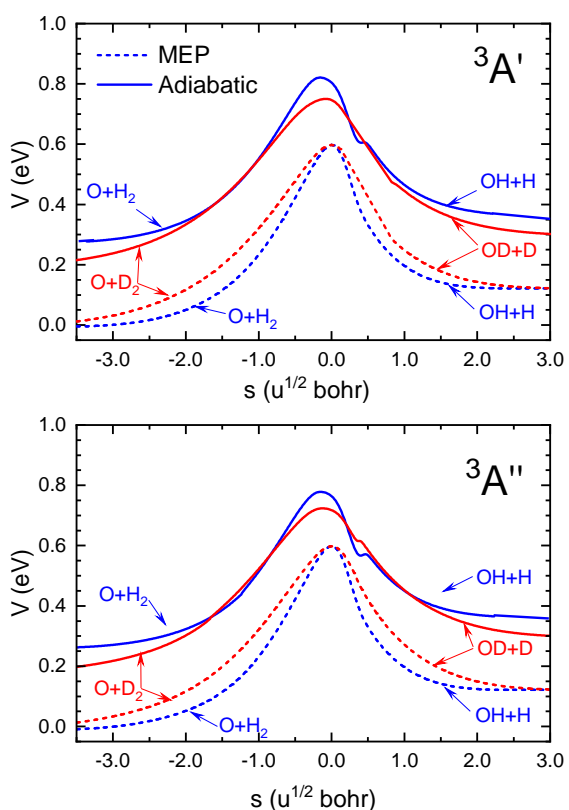

Figure S1. Minimum energy paths (dashed lines) as a function of the mass-scaled reaction coordinate (see text for definition) for the  $O(^3P)+H_2$  (blue) and  $O(^3P)+D_2$  (red) reactions on the  $^3A'$  (upper panel) and  $^3A''$  (bottom panel). The vibrationally adiabatic reaction paths including their respective zero point energies are also shown as solid lines. All the paths are referred to the minimum asymptotic isotopically invariant potential of  $H_2$ .

<sup>a</sup> Departamento de Química Física, Unidad Asociada CSIC, Universidad Complutense de Madrid, 28040 Madrid, Spain

<sup>b</sup> Departamento de Química Física, Universidad de Salamanca, 37008 Salamanca, Spain

<sup>c</sup> Instituto de Física Fundamental, CSIC, C/ Serrano 121-123, 28006 Madrid, Spain

\* Corresponding author: aoiz@ucm.es

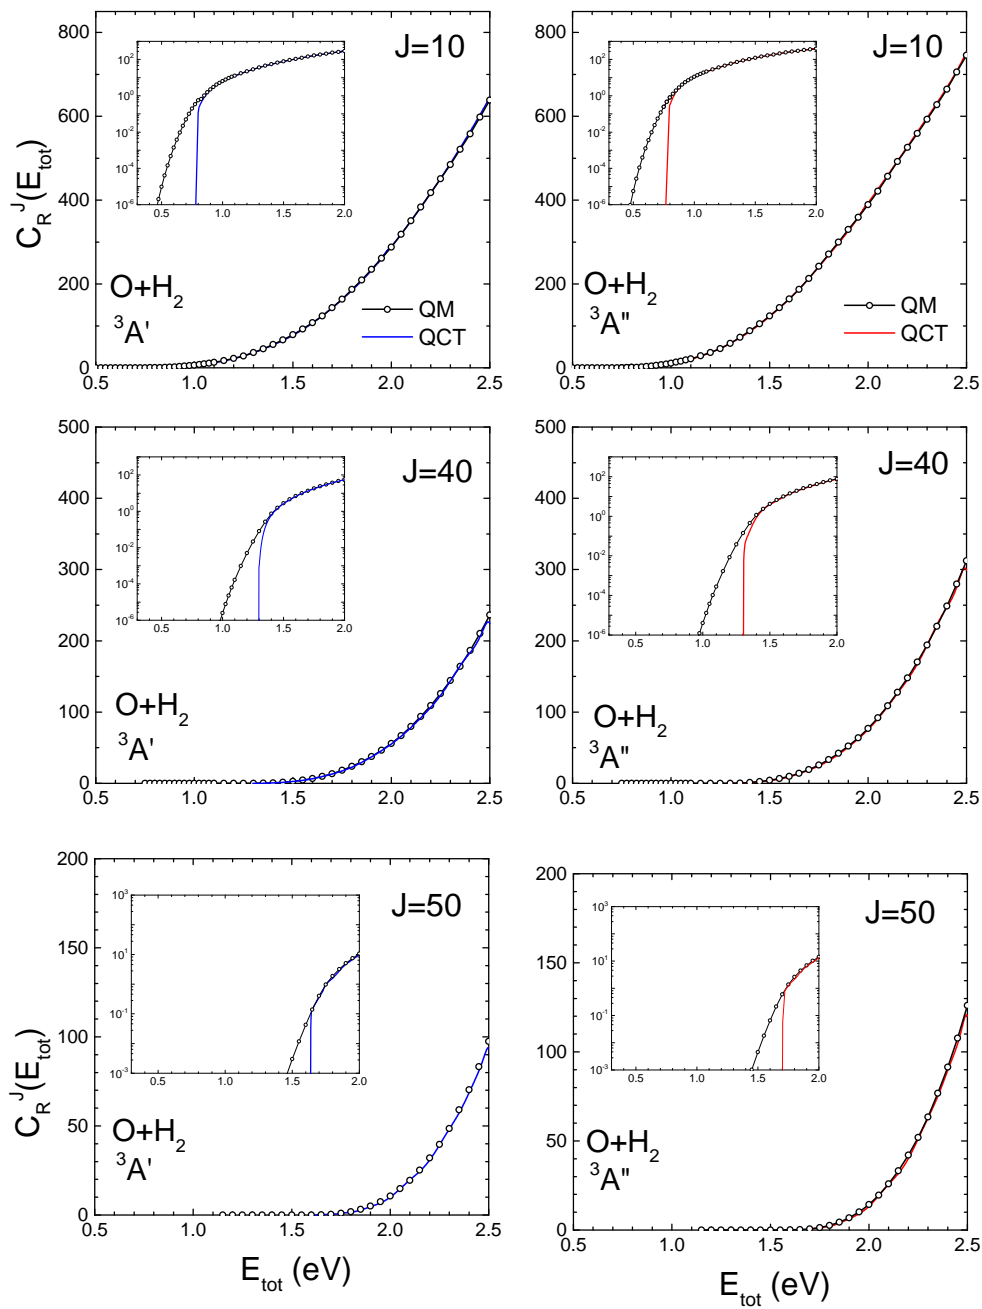

Figure S2. QM (black solid line with open circles) and QCT cumulative reaction probabilities resolved in  $J$ , as a function of the total energy for the  $O(^3P)+H_2$  reaction on the  $^3A'$  PES (blue line, left panels) and on the  $^3A''$  PES (red line, right panels) at the indicated values of  $J$ . In each case, the inset depicts the low energy region in logarithmic scale.

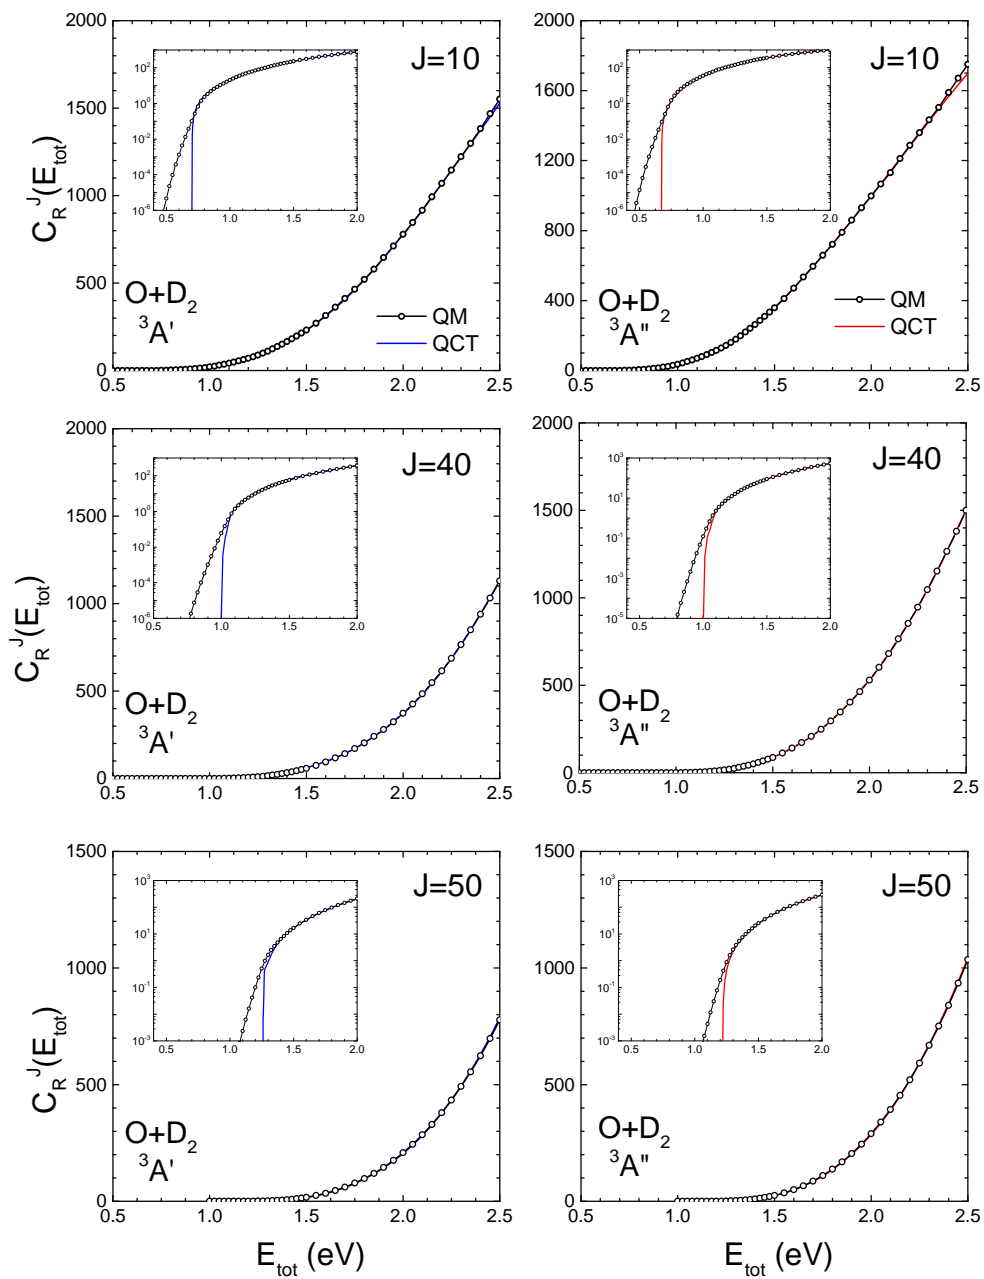

Figure S3. Same as Figure S2 for the  $O(^3P)+D_2$  reaction.

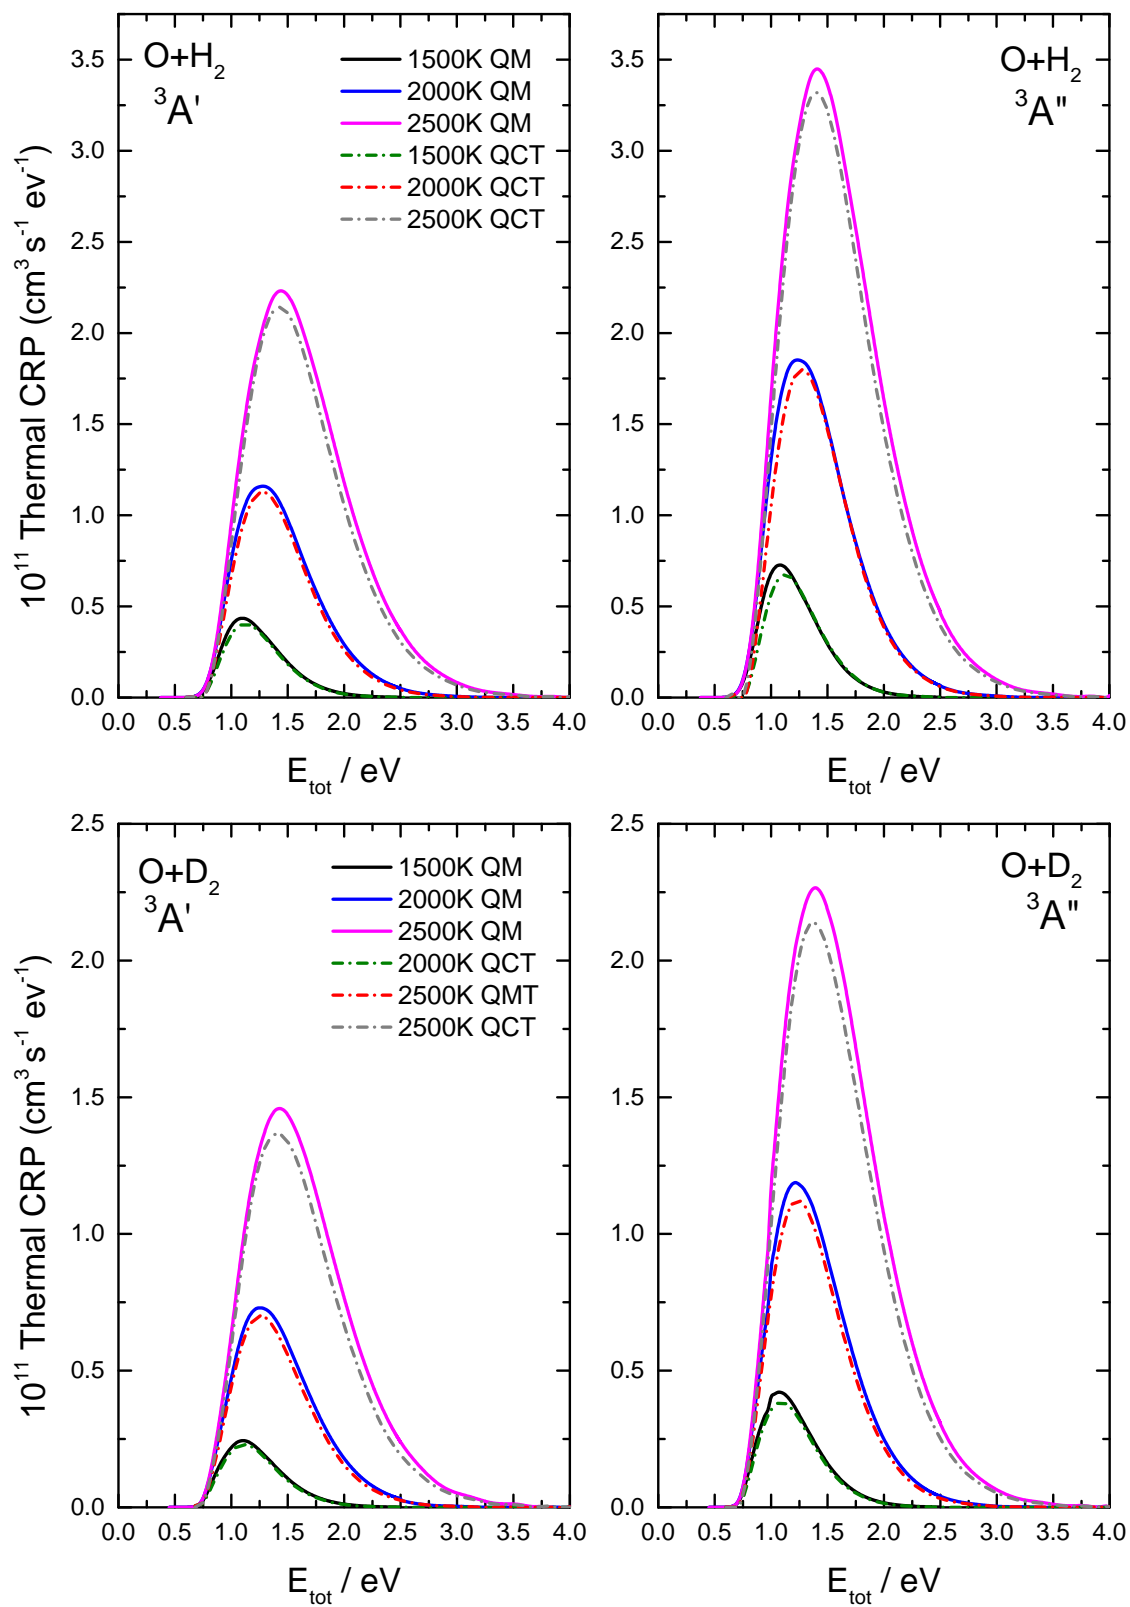

Figure S4. Comparison of QM (solid lines) and QCT (dash-dotted lines) thermal cumulative reaction probabilities at 1500 K, 2000 K and 2500 K for the  $O(^3P)+H_2$  reaction (top panels) and for the  $O(^3P)+D_2$  reaction (bottom panels). Left panels results are on the  $^3A'$  and right panels on the  $^3A''$ . Integration of each of these curves renders the respective rate coefficients.

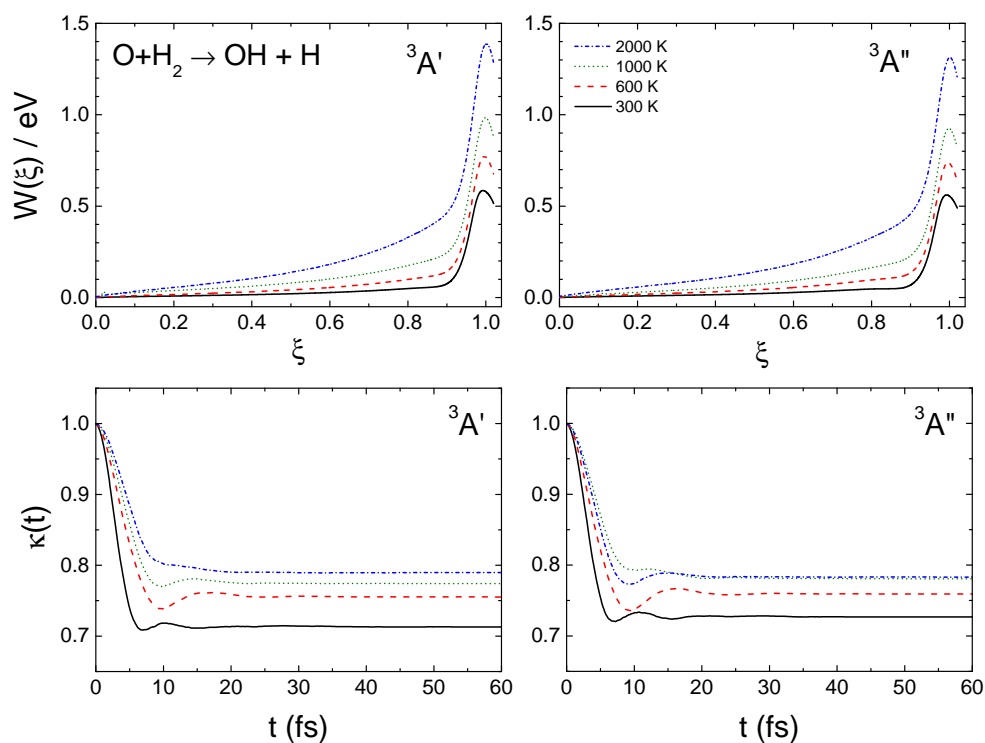

Figure S5. RPMD potential of mean force profiles (top panels) and time dependent transmission coefficients (bottom panels) for the  $O(^3P) + H_2$  reaction on the  $^3A'$  (left panels) and on the  $^3A''$  (right panels) PESs at 300 K (black solid), 600 K (red dash), 1000 K (green dash-dot), and 2000 K (blue dash-dot-dash).

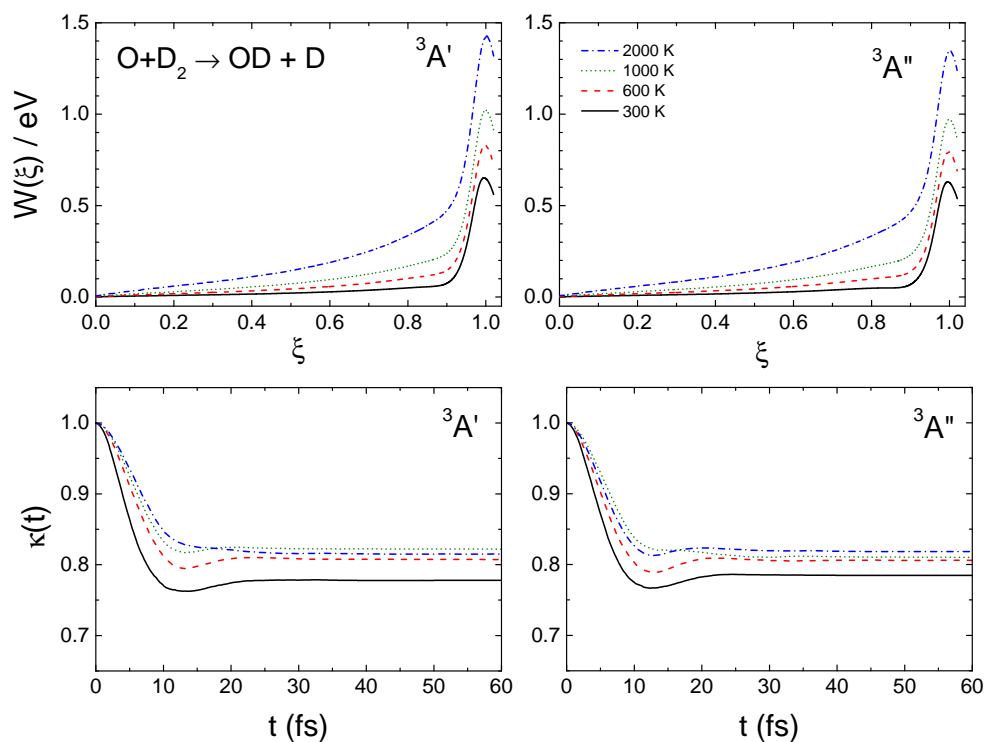

Figure S6. Same as Figure S5 for the  $O(^3P) + D_2$  reaction.

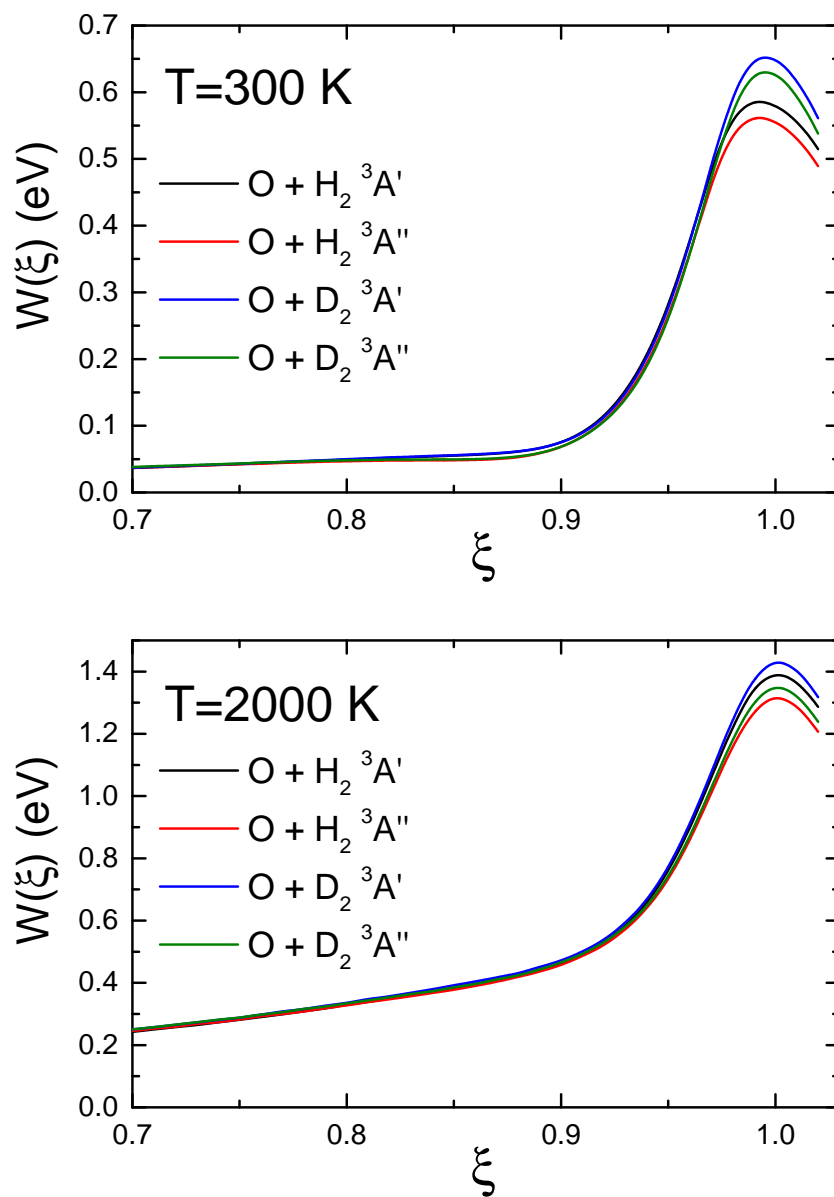

Figure S7. Comparison of RPMD potential of mean force profiles for the  $O(^3P)+H_2$  and  $O(^3P)+D_2$  reactions on the  $^3A'$  and on the  $^3A''$  PESs at 300 K (top panel), and 2000 K (bottom panel).

Table S1. RPMD Rate coefficients for the reaction  $O(^3P)+H_2$ , computed in the  $^3A'$  and  $^3A''$  PESs. The parenthesis denote powers of ten. Units are in  $cm^3s^{-1}$ .

| $^3A'$ |       |            |                                |            | $^3A''$    |                                |            |
|--------|-------|------------|--------------------------------|------------|------------|--------------------------------|------------|
| $T/K$  | $n_b$ | $k_{QTST}$ | $\kappa(t \rightarrow \infty)$ | $k_{RPMD}$ | $k_{QTST}$ | $\kappa(t \rightarrow \infty)$ | $k_{RPMD}$ |
| 200    | 1     | 1.018(-26) | 0.842                          | 8.570(-27) | 2.263(-26) | 0.830                          | 1.870(-26) |
| 200    | 32    | 9.900(-21) | 0.607                          | 6.005(-21) | 2.855(-20) | 0.617                          | 1.763(-20) |
| 200    | 128   | 1.230(-20) | 0.625                          | 7.685(-21) | 3.640(-20) | 0.625                          | 2.275(-20) |
| 250    | 1     | 1.413(-23) | 0.844                          | 1.166(-23) | 3.138(-23) | 0.840                          | 2.624(-23) |
| 250    | 32    | 1.894(-19) | 0.680                          | 1.288(-19) | 5.163(-19) | 0.692                          | 3.576(-19) |
| 250    | 64    | 2.102(-19) | 0.682                          | 1.434(-19) | 5.640(-19) | 0.687                          | 3.876(-19) |
| 300    | 1     | 1.829(-21) | 0.847                          | 1.548(-21) | 4.025(-21) | 0.838                          | 3.372(-21) |
| 300    | 32    | 2.261(-18) | 0.713                          | 1.612(-18) | 5.755(-18) | 0.727                          | 4.183(-18) |
| 300    | 64    | 2.423(-18) | 0.716                          | 1.734(-18) | 6.296(-18) | 0.723                          | 4.552(-18) |
| 400    | 1     | 9.050(-19) | 0.840                          | 7.604(-19) | 1.855(-18) | 0.835                          | 1.549(-18) |
| 400    | 32    | 9.255(-17) | 0.742                          | 6.866(-17) | 2.141(-16) | 0.743                          | 1.591(-16) |
| 400    | 64    | 9.698(-17) | 0.739                          | 7.164(-17) | 2.250(-16) | 0.737                          | 1.659(-16) |
| 500    | 1     | 3.872(-17) | 0.836                          | 3.237(-17) | 7.888(-17) | 0.837                          | 6.600(-17) |
| 500    | 32    | 6.326(-16) | 0.746                          | 4.716(-16) | 2.410(-15) | 0.751                          | 1.810(-15) |
| 500    | 64    | 1.181(-15) | 0.745                          | 8.806(-16) | 2.426(-15) | 0.748                          | 1.815(-15) |
| 600    | 1     | 5.782(-16) | 0.839                          | 4.853(-16) | 1.111(-15) | 0.833                          | 9.258(-16) |
| 600    | 32    | 6.920(-15) | 0.755                          | 5.226(-15) | 1.364(-14) | 0.759                          | 1.035(-14) |
| 700    | 1     | 3.300(-14) | 0.834                          | 2.752(-15) | 6.906(-15) | 0.840                          | 5.794(-15) |
| 700    | 32    | 2.622(-14) | 0.760                          | 1.991(-14) | 5.106(-14) | 0.759                          | 3.875(-14) |
| 800    | 1     | 1.383(-14) | 0.840                          | 1.162(-14) | 2.588(-14) | 0.845                          | 2.187(-14) |
| 800    | 32    | 7.587(-14) | 0.767                          | 5.820(-14) | 1.388(-13) | 0.768                          | 1.067(-13) |
| 1000   | 1     | 1.060(-13) | 0.834                          | 8.829(-14) | 1.894(-13) | 0.834                          | 1.580(-13) |
| 1000   | 32    | 3.462(-13) | 0.774                          | 2.680(-13) | 6.141(-13) | 0.783                          | 4.808(-13) |
| 1200   | 1     | 4.454(-13) | 0.824                          | 3.670(-13) | 7.417(-13) | 0.820                          | 6.088(-13) |
| 1200   | 32    | 1.057(-12) | 0.776                          | 8.203(-13) | 1.746(-12) | 0.783                          | 1.368(-12) |
| 1500   | 1     | 1.883(-12) | 0.821                          | 1.546(-12) | 3.148(-12) | 0.816                          | 2.570(-12) |
| 1500   | 32    | 3.429(-12) | 0.780                          | 2.673(-12) | 5.492(-12) | 0.785                          | 4.311(-12) |
| 1800   | 1     | 5.100(-12) | 0.817                          | 4.166(-12) | 8.345(-12) | 0.813                          | 6.785(-12) |
| 1800   | 32    | 8.050(-12) | 0.788                          | 6.348(-12) | 1.282(-11) | 0.780                          | 1.001(-11) |
| 2000   | 1     | 8.729(-12) | 0.818                          | 7.140(-12) | 1.370(-11) | 0.805                          | 1.104(-11) |
| 2000   | 32    | 1.260(-11) | 0.790                          | 9.950(-12) | 1.962(-11) | 0.781                          | 1.532(-11) |
| 2200   | 1     | 1.365(-11) | 0.810                          | 1.104(-11) | 2.126(-11) | 0.801                          | 1.702(-11) |
| 2200   | 32    | 1.841(-11) | 0.789                          | 1.452(-11) | 2.812(-11) | 0.774                          | 2.176(-11) |
| 2500   | 1     | 2.313(-11) | 0.794                          | 1.836(-11) | 3.664(-11) | 0.784                          | 2.874(-11) |
| 2500   | 32    | 2.960(-11) | 0.780                          | 2.308(-11) | 4.583(-11) | 0.775                          | 3.552(-11) |

Table S2. RPMD Rate coefficients for the reaction  $O(^3P)+D_2$ , computed in the  $^3A'$  and  $^3A''$  PESs. The parenthesis denote powers of ten. Units are in  $cm^3s^{-1}$ .

| $^3A'$ |       |            |                                |            | $^3A''$    |                                |            |
|--------|-------|------------|--------------------------------|------------|------------|--------------------------------|------------|
| $T/K$  | $n_b$ | $k_{QTST}$ | $\kappa(t \rightarrow \infty)$ | $k_{RPMD}$ | $k_{QTST}$ | $\kappa(t \rightarrow \infty)$ | $k_{RPMD}$ |
| 200    | 1     | 7.334(-27) | 0.852                          | 6.249(-27) | 1.717(-26) | 0.850                          | 1.458(-26) |
| 200    | 64    | 5.832(-23) | 0.737                          | 4.300(-23) | 1.736(-22) | 0.740                          | 1.285(-22) |
| 250    | 1     | 1.003(-23) | 0.858                          | 8.610(-24) | 2.202(-23) | 0.855                          | 1.883(-23) |
| 250    | 64    | 4.434(-21) | 0.770                          | 3.416(-21) | 1.174(-20) | 0.771                          | 9.058(-21) |
| 300    | 1     | 1.308(-21) | 0.854                          | 1.117(-21) | 2.893(-21) | 0.860                          | 2.484(-21) |
| 300    | 64    | 1.284(-19) | 0.778                          | 9.987(-20) | 3.034(-19) | 0.785                          | 2.381(-19) |
| 400    | 1     | 6.347(-19) | 0.859                          | 5.453(-19) | 1.308(-18) | 0.853                          | 1.116(-18) |
| 400    | 64    | 1.225(-17) | 0.785                          | 9.618(-18) | 2.680(-17) | 0.791                          | 2.120(-17) |
| 500    | 1     | 2.830(-17) | 0.858                          | 2.426(-17) | 5.604(-17) | 0.860                          | 4.812(-17) |
| 500    | 64    | 2.370(-16) | 0.802                          | 1.900(-16) | 4.407(-16) | 0.800                          | 3.766(-16) |
| 600    | 1     | 4.10(-16)  | 0.858                          | 3.522(-16) | 7.736(-16) | 0.854                          | 6.607(-16) |
| 600    | 64    | 1.760(-15) | 0.807                          | 1.421(-15) | 3.455(-15) | 0.806                          | 2.784(-15) |
| 700    | 1     | 2.397(-15) | 0.856                          | 2.051(-15) | 4.914(-15) | 0.850                          | 4.177(-15) |
| 700    | 64    | 8.244(-15) | 0.821                          | 6.768(-15) | 1.542(-14) | 0.818                          | 1.262(-14) |
| 800    | 1     | 9.856(-15) | 0.854                          | 8.415(-15) | 1.811(-14) | 0.850                          | 1.540(-14) |
| 800    | 64    | 2.660(-14) | 0.821                          | 2.185(-14) | 4.884(-14) | 0.820                          | 4.004(-14) |
| 1000   | 1     | 7.675(-14) | 0.841                          | 6.452(-14) | 1.340(-13) | 0.850                          | 1.138(-13) |
| 1000   | 64    | 1.583(-13) | 0.822                          | 1.301(-13) | 2.623(-13) | 0.818                          | 2.146(-13) |
| 1200   | 1     | 3.137(-13) | 0.844                          | 2.647(-13) | 5.344(-13) | 0.840                          | 4.492(-13) |
| 1200   | 64    | 5.102(-13) | 0.820                          | 4.182(-13) | 8.700(-13) | 0.827                          | 7.192(-13) |
| 1500   | 1     | 1.335(-12) | 0.840                          | 1.121(-12) | 2.200(-12) | 0.840                          | 1.847(-12) |
| 1500   | 64    | 1.863(-12) | 0.823                          | 1.533(-12) | 2.980(-12) | 0.823                          | 2.451(-12) |
| 1800   | 1     | 3.584(-12) | 0.831                          | 2.980(-12) | 5.885(-12) | 0.834                          | 4.908(-12) |
| 1800   | 64    | 3.584(-12) | 0.820                          | 3.761(-12) | 7.591(-12) | 0.13                           | 6.169(-12) |
| 2000   | 1     | 6.266(-12) | 0.830                          | 5.198(-12) | 9.981(-12) | 0.823                          | 8.217(-12) |
| 2000   | 64    | 7.484(-12) | 0.815                          | 6.097(-12) | 1.208(-11) | 0.810                          | 9.777(-12) |
| 2200   | 1     | 7.484(-12) | 0.827                          | 8.202(-12) | 1.495(-11) | 0.821                          | 1.228(-11) |
| 2200   | 64    | 1.144(-11) | 0.816                          | 9.337(-12) | 1.783(-11) | 0.802                          | 1.431(-11) |
| 2500   | 1     | 1.144(-11) | 0.816                          | 1.379(-11) | 2.570(-11) | 0.807                          | 2.075(-11) |
| 2500   | 64    | 1.900(-11) | 0.810                          | 1.530(-11) | 2.974(-11) | 0.787                          | 2.340(-11) |



## Recollection of rate coefficient ( $\text{cm}^3 \text{ s}^{-1}$ ) expressions for $\text{O}+\text{H}_2$ and $\text{O}+\text{D}_2$

Sutherland et al.<sup>1</sup>

$$k_{\text{H}_2}(T) = 8.44 \cdot 10^{-20} T^{2.67} \exp(-3167/T); \quad 297 \text{ K} \leq T \leq 2495 \text{ K} \quad (1)$$

Marshall and Fontijn<sup>2</sup>

$$k_{\text{H}_2}(T) = 7.30 \cdot 10^{-21} T^{2.93} \exp(-2980/T); \quad 350 \text{ K} \leq T \leq 1420 \text{ K} \quad (2)$$

$$k_{\text{H}_2}(T) = 1.5 \cdot 10^{-12} \exp(-3540/T) + 3.7 \cdot 10^{-10} \exp(-7450/T); \quad 300 \text{ K} \leq T \leq 2500 \text{ K}$$

$$k_{\text{D}_2}(T) = 1.4 \cdot 10^{-12} \exp(-4250/T) + 3.6 \cdot 10^{-10} \exp(-7980/T); \quad 390 \text{ K} \leq T \leq 2480 \text{ K}$$

$$\frac{k_{\text{H}_2}(T)}{k_{\text{D}_2}(T)} = 6.5 \cdot 10^{-3} T^{0.64} \exp(1230/T); \quad 390 \text{ K} \leq T \leq 1420 \text{ K} \quad (3)$$

Natarajan and Roth<sup>3</sup>

$$k_{\text{H}_2}(T) = 6.18 \cdot 10^{-18} T^{2.17} \exp(-4080/T).; \quad 1713 \text{ K} \leq T \leq 3532 \text{ K} \quad (4)$$

$$k_{\text{H}_2}(T) = 6.43 \cdot 10^{-20} T^{2.70} \exp(-3150/T).; \quad 300 \text{ K} \leq T \leq 3532 \text{ K} \quad (5)$$

Zhu et al.<sup>4</sup>

$$k_{\text{D}_2}(T) = 2.43 \cdot 10^{-16} T^{1.70} \exp(-4911/T); \quad 343 \text{ K} \leq T \leq 2487 \text{ K} \quad (6)$$

$$k_{\text{D}_2}(T) = 4.78 \cdot 10^{-11} \exp(-5710/T); \quad 343 \text{ K} \leq T \leq 500 \text{ K} \quad (7)$$

Michael<sup>5</sup>

$$k_{\text{D}_2}(T) = 1.95 \cdot 10^{-15} T^{1.45} \exp(-5250/T).; \quad 825 \text{ K} \leq T \leq 2500 \text{ K} \quad (8)$$

$$\frac{k_{\text{H}_2}(T)}{k_{\text{D}_2}(T)} = 3.47 \cdot 10^{-4} T^{0.97} \exp(1744/T); \quad 350 \text{ K} \leq T \leq 2500 \text{ K} \quad (9)$$

Shin et al.<sup>6</sup>

$$k_{\text{H}_2}(T) = 1.31 \cdot 10^{-9} \exp(-9381/T).; \quad 1790 \text{ K} \leq T \leq 2250 \text{ K} \quad (10)$$

Yang et al.<sup>7</sup>

$$k_{\text{H}_2}(T) = 6.14 \cdot 10^{-10} \exp(-7818/T); \quad 1600 \text{ K} \leq T \leq 2500 \text{ K} \quad (11)$$

$$k_{\text{H}_2}(T) = 6.42 \cdot 10^{-20} T^{2.70} \exp(-3150/T); \quad 297 \text{ K} \leq T \leq 3530 \text{ K} \quad (12)$$

$$k_{\text{D}_2}(T) = 7.80 \cdot 10^{-10} \exp(-8900/T); \quad 2370 \text{ K} \leq T \leq 3390 \text{ K} \quad (13)$$

$$k_{\text{D}_2}(T) = 1.99 \cdot 10^{-15} T^{1.72} \exp(-4480/T); \quad 340 \text{ K} \leq T \leq 3390 \text{ K} \quad (14)$$

$$\frac{k_{\text{H}_2}(T)}{k_{\text{D}_2}(T)} = 3.1 \cdot 10^{-2} T^{0.45} \exp(800/T); \quad 2400 \text{ K} \leq T \leq 3400 \text{ K} \quad (15)$$

Ryu et al.<sup>8</sup>

$$k_{\text{H}_2}(T) = 3.12 \cdot 10^{-10} \exp(-6897/T).; \quad 1424\text{K} \leq T \leq 2427\text{K} \quad (16)$$

Baulch et al.<sup>9</sup>

$$k_{\text{H}_2}(T) = 6.34 \cdot 10^{-12} \exp(-4000/T) + 1.46 \cdot 10^{-9} \exp(-9650/T) \quad (17)$$

$$298\text{K} \leq T \leq 3300\text{K}$$

#### Notes and references

- 1 J. W. Sutherland, J. V. Michael, A. N. Pirraglia, F. L. Nesbitt and R. B. Klemm, *21st Sym. Int. Combust. Inst.*, 1986, 929–941.
- 2 P. Marshall and A. Fontijn, *J. Chem. Phys.*, 1987, **87**, 6988–6994.
- 3 K. Natarajan and P. Roth, *Combust. Flame*, 1987, **70**, 267–279.
- 4 Y. F. Zhu, S. Arepalli and R. J. Gordon, *J. Chem. Phys.*, 1989, **90**, 183–188.
- 5 J. V. Michael, *J. Chem. Phys.*, 1989, **90**, 189–198.
- 6 K. S. Shin, N. Fujii and W. C. J. Gardiner, *Chem. Phys. Lett.*, 1989, **161**, 219.
- 7 H. X. Yang, K. S. Shin and W. C. J. Gardiner, *Chem. Phys. Lett.*, 1993, **207**, 69–74.
- 8 S. O. Ryu, S. M. Hwang and M. J. Rabinowitz, *Chem. Phys. Lett.*, 1995, **242**, 279–284.
- 9 D. L. Baulch, C. T. Bowman, C. J. Cobos, R. A. Cox, T. Just, J. A. Kerr, M. J. Pilling, D. Stocker, J. Troe, W. Tsang, R. W. Walker and J. Warnatz, *J. Phys. Chem. Ref. Data*, 2005, **34**, 757–1397.
